# Supplementary material
Source: ML conference proceedings conference paper supplement (https://openaccess.thecvf.com/content/ICCV2023/html/Yu_Both_Diverse_and_ICCV_2023_paper.html)
Supplement: Supplementary file 2 [file Yu_Both_Diverse_and_ICCV_2023_supplemental.zip]

Archive with 4 entries (4 files):
- 05532-supp.pdf
- Manipulation_demo1.gif
- Manipulation_demo2.gif
- Manipulation_demo3.gif
