# Supplementary material
Source: ML conference proceedings conference paper supplement (https://openaccess.thecvf.com/content/ICCV2023/html/Yu_Both_Diverse_and_ICCV_2023_paper.html)

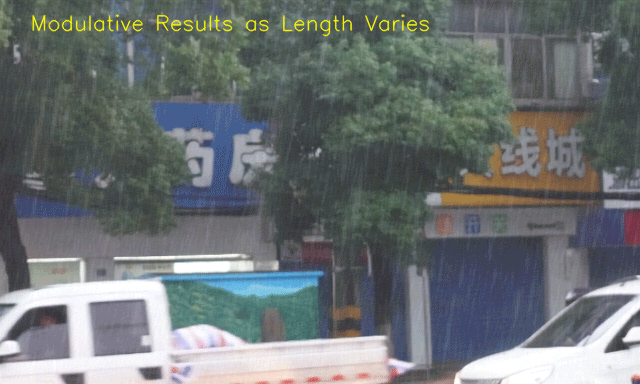

Supplement: Supplementary file 2 [file Yu_Both_Diverse_and_ICCV_2023_supplemental.zip › Manipulation_demo1.gif]

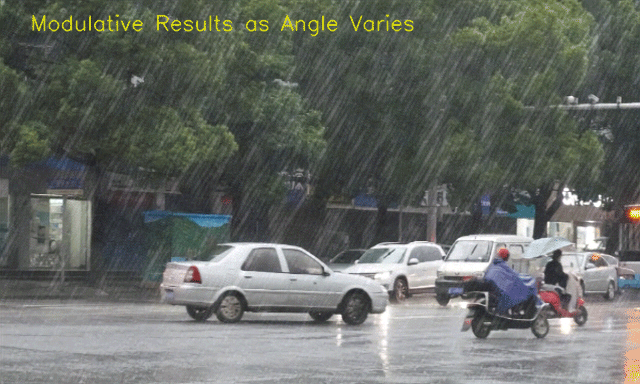

Supplement: Supplementary file 2 [file Yu_Both_Diverse_and_ICCV_2023_supplemental.zip › Manipulation_demo2.gif]

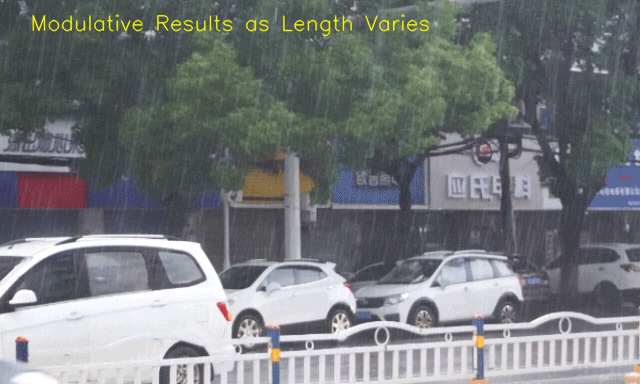

Supplement: Supplementary file 2 [file Yu_Both_Diverse_and_ICCV_2023_supplemental.zip › Manipulation_demo3.gif]
